# Supplementary material
Source: publisher figshare collection journal article supplement (https://rs.figshare.com/ndownloader/files/31072237)

**Saturation plot of all positions**

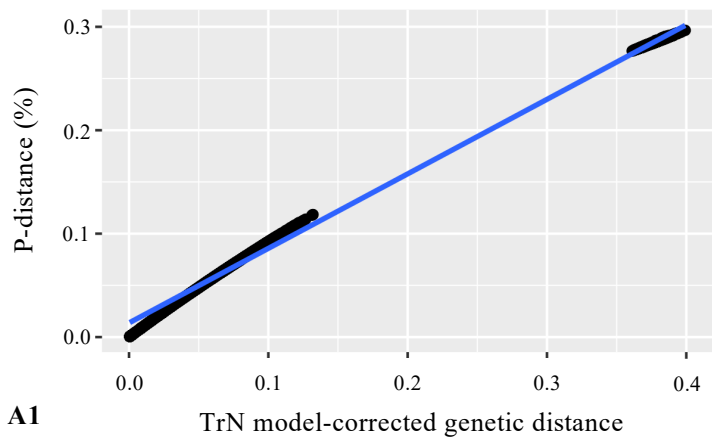

**Saturation plot of all positions**

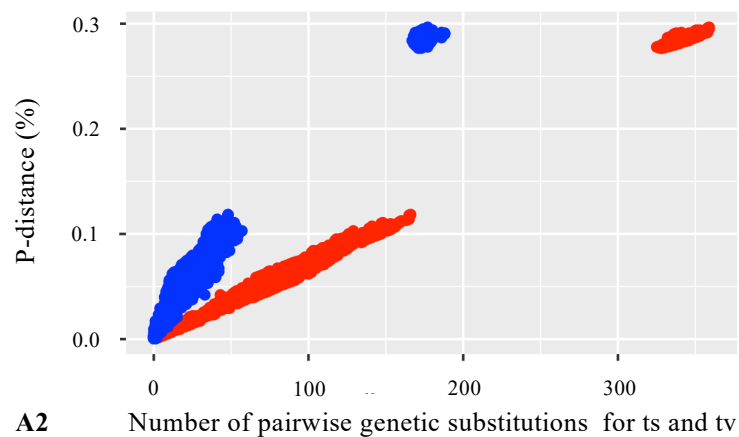

**Saturation plot of 1<sup>st</sup> positions**

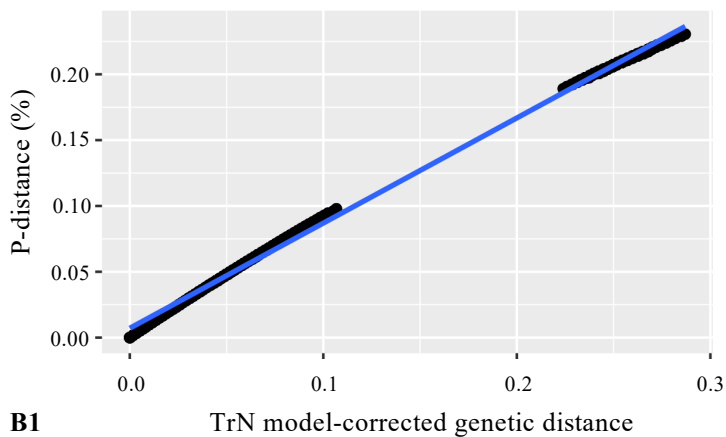

**Saturation plot of 1<sup>st</sup> positions**

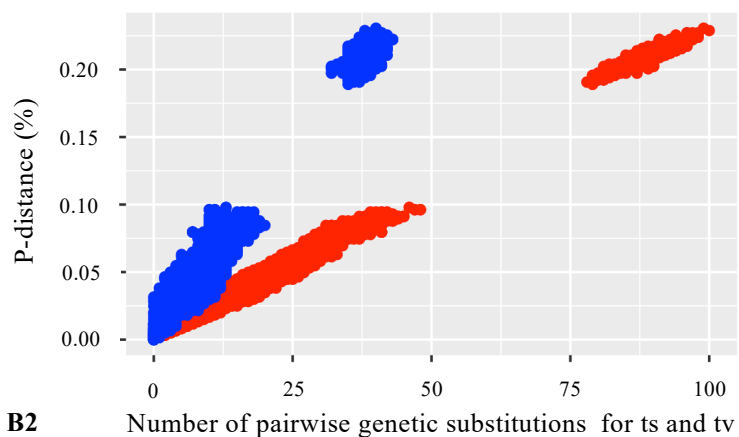

**Saturation plot of 2<sup>nd</sup> positions**

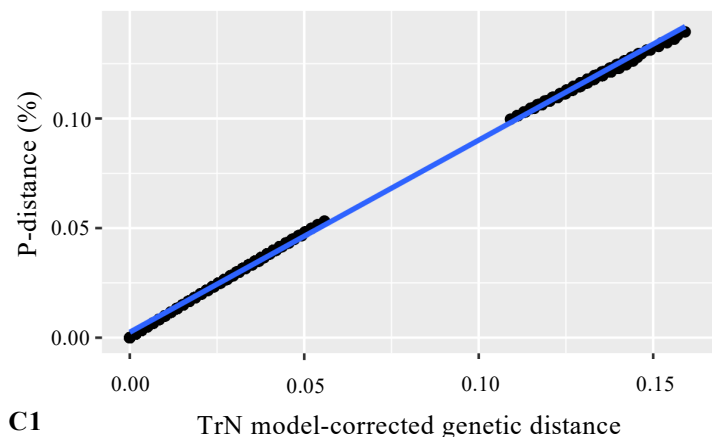

**Saturation plot of 2<sup>nd</sup> positions**

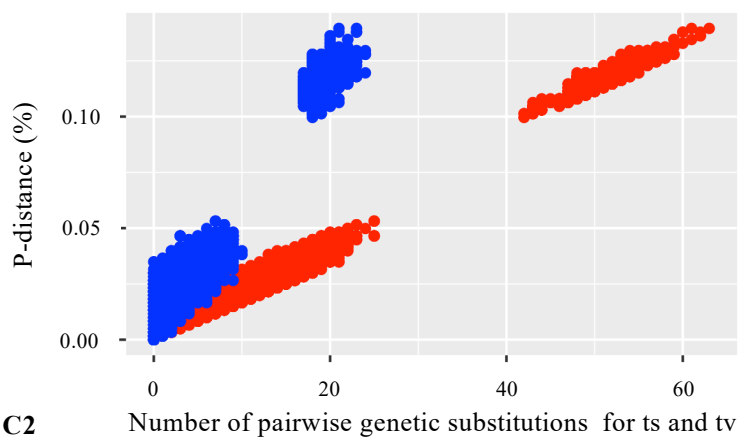

**Saturation plot of 3<sup>rd</sup> positions**

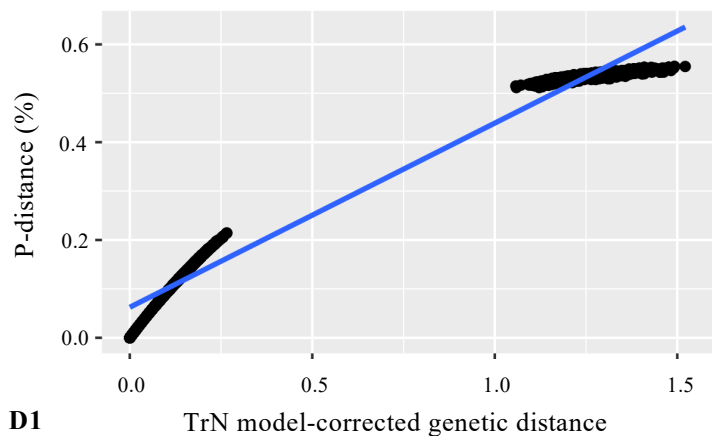

**Saturation plot of 3<sup>rd</sup> positions**

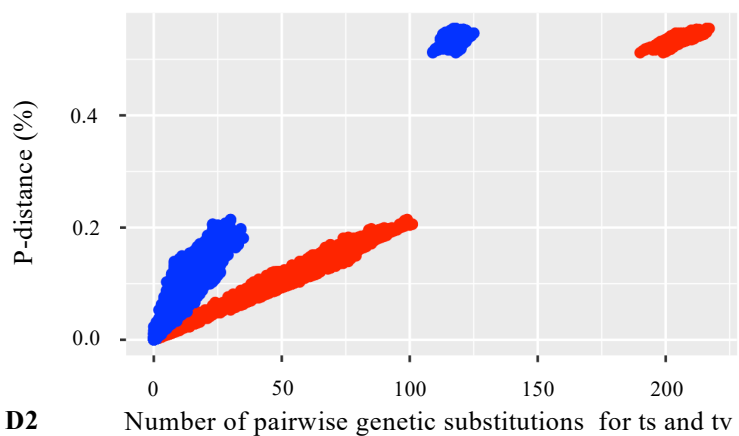

Supplement: Supplementary file 1 [file 31072237]
